# Supplementary material for: Genetic recombination and diversity of sapovirus in pediatric patients with acute gastroenteritis in Thailand, 2010–2018
Source: PeerJ. 2020 Feb 6;8:e8520. doi: 10.7717/peerj.8520 (PMC7007980; doi:10.7717/peerj.8520)
Supplement: Supplemental Information 1 [file peerj-08-8520-s001.xlsx]

## Sheet: Sheet1
Sequence_ID/ isolates	Collection_date	Country	Host	Isolation_source	Genotype	Gene	GenBank accession no.
CMH-N018-10	2010-12-12	Thailand	Homo sapiens	Stool	GI.1	RdRp	MN245671
CMH-S050-10	2010-12-14	Thailand	Homo sapiens	Stool	GI.1	RdRp	MN245672
CMH-N131-13	2013-10-03	Thailand	Homo sapiens	Stool	GI.1	RdRp	MN245673
CMH-S004-13	2013-01-01	Thailand	Homo sapiens	Stool	GI.1	RdRp	MN245674
CMH-N006-15	2015-07-09	Thailand	Homo sapiens	Stool	GI.1	RdRp	MN245675
CMH-N007-15	2015-07-09	Thailand	Homo sapiens	Stool	GI.1	RdRp	MN245676
CMH-S166-15	2015-08-13	Thailand	Homo sapiens	Stool	GI.1	RdRp	MN245677
CMH-S198-16	2016-08-11	Thailand	Homo sapiens	Stool	GI.1	RdRp	MN245678
CMH-S229-16	2016-09-12	Thailand	Homo sapiens	Stool	GI.1	RdRp	MN245679
CMH-ST016-16	2016-02-02	Thailand	Homo sapiens	Stool	GI.1	RdRp	MN245680
CMH-ST090-16	2016-03-21	Thailand	Homo sapiens	Stool	GI.1	RdRp	MN245681
CMH-ST163-16	2016-08-13	Thailand	Homo sapiens	Stool	GI.1	RdRp	MN245682
CMH-ST199-16	2016-12-12	Thailand	Homo sapiens	Stool	GI.1	RdRp	MN245683
CMH-S003-17	2017-02-22	Thailand	Homo sapiens	Stool	GI.1	RdRp	MN245684
CMH-S023-17	2017-04-04	Thailand	Homo sapiens	Stool	GI.1	RdRp	MN245685
CMH-S089-17	2017-06-21	Thailand	Homo sapiens	Stool	GI.1	RdRp	MN245686
CMH-R031-18	2018-10-21	Thailand	Homo sapiens	Stool	GI.1	RdRp	MN245687
CMH-S174-18	2018-11-21	Thailand	Homo sapiens	Stool	GI.1	RdRp	MN245688
CMH-ST097-18	2018-04-16	Thailand	Homo sapiens	Stool	GI.1	RdRp	MN245689
CMH-ST169-18	2018-06-27	Thailand	Homo sapiens	Stool	GI.1	RdRp	MN245690
CMH-S152-15	2015-06-16	Thailand	Homo sapiens	Stool	GI.2	RdRp	MN245691
CMH-S252-15	2015-12-20	Thailand	Homo sapiens	Stool	GI.2	RdRp	MN245692
CMH-S254-15	2015-12-31	Thailand	Homo sapiens	Stool	GI.2	RdRp	MN245693
CMH-S108-16	2016-03-29	Thailand	Homo sapiens	Stool	GI.2	RdRp	MN245694
CMH-ST004-16	2016-01-11	Thailand	Homo sapiens	Stool	GI.2	RdRp	MN245695
CMH-ST029-16	2016-02-07	Thailand	Homo sapiens	Stool	GI.2	RdRp	MN245696
CMH-R076-18	2018-10-21	Thailand	Homo sapiens	Stool	GI.2	RdRp	MN245697
CMH-N061-18	2018-02-18	Thailand	Homo sapiens	Stool	GI.5	RdRp	MN245698
CMH-N145-12	2012-08-10	Thailand	Homo sapiens	Stool	GII.1	RdRp	MN245699
CMH-N021-13	2013-05-02	Thailand	Homo sapiens	Stool	GII.1	RdRp	MN245700
CMH-S034-13	2013-04-01	Thailand	Homo sapiens	Stool	GII.1	RdRp	MN245701
CMH-S050-17	2017-06-16	Thailand	Homo sapiens	Stool	GII.1	RdRp	MN245702
CMH-S057-17	2017-06-21	Thailand	Homo sapiens	Stool	GII.1	RdRp	MN245703
CMH-S120-17	2017-11-21	Thailand	Homo sapiens	Stool	GII.1	RdRp	MN245704
CMH-ST028-17	2017-05-09	Thailand	Homo sapiens	Stool	GII.1	RdRp	MN245705
CMH-N091-18	2018-06-24	Thailand	Homo sapiens	Stool	GII.1	RdRp	MN245706
CMH-N104-18	2018-09-10	Thailand	Homo sapiens	Stool	GII.1	RdRp	MN245707
CMH-R140-18	2018-10-21	Thailand	Homo sapiens	Stool	GII.1	RdRp	MN245708
CMH-S175-18	2018-11-21	Thailand	Homo sapiens	Stool	GII.1	RdRp	MN245709
CMH-ST189-18	2018-07-27	Thailand	Homo sapiens	Stool	GII.1	RdRp	MN245710
CMH-ST091-16	2016-03-21	Thailand	Homo sapiens	Stool	GII.5	RdRp	MN245711
CMH-ST095-16	2016-03-23	Thailand	Homo sapiens	Stool	GII.5	RdRp	MN245712
CMH-R089-18	2018-10-21	Thailand	Homo sapiens	Stool	GII.5	RdRp	MN245713
CMH-ST202-18	2018-08-15	Thailand	Homo sapiens	Stool	GII.5	RdRp	MN245714
CMH-ST207-18	2018-08-17	Thailand	Homo sapiens	Stool	GII.5	RdRp	MN245715
CMH-ST247-18	2018-11-10	Thailand	Homo sapiens	Stool	GII.5	RdRp	MN245716
CMH-ST270-18	2018-12-29	Thailand	Homo sapiens	Stool	GII.5	RdRp	MN245717
CMH-N061-12	2012-02-11	Thailand	Homo sapiens	Stool	GIV.1	RdRp	MN245718
CMH-N028-18	2018-02-02	Thailand	Homo sapiens	Stool	GIV.1	RdRp	MN245719
CMH-N018-10	2010-12-12	Thailand	Homo sapiens	Stool	GI.1	VP1	MN253492
CMH-S050-10	2010-12-14	Thailand	Homo sapiens	Stool	GI.1	VP1	MN253493
CMH-N131-13	2013-10-03	Thailand	Homo sapiens	Stool	GI.1	VP1	MN253494
CMH-S004-13	2013-01-01	Thailand	Homo sapiens	Stool	GI.1	VP1	MN253495
CMH-N006-15	2015-07-09	Thailand	Homo sapiens	Stool	GI.1	VP1	MN253496
CMH-N007-15	2015-07-09	Thailand	Homo sapiens	Stool	GI.1	VP1	MN253497
CMH-S166-15	2015-08-13	Thailand	Homo sapiens	Stool	GI.1	VP1	MN253498
CMH-S198-16	2016-08-11	Thailand	Homo sapiens	Stool	GI.1	VP1	MN253499
CMH-S229-16	2016-09-12	Thailand	Homo sapiens	Stool	GI.1	VP1	MN253500
CMH-ST016-16	2016-02-02	Thailand	Homo sapiens	Stool	GI.1	VP1	MN253501
CMH-ST090-16	2016-03-21	Thailand	Homo sapiens	Stool	GI.1	VP1	MN253502
CMH-ST163-16	2016-08-13	Thailand	Homo sapiens	Stool	GI.1	VP1	MN253503
CMH-ST199-16	2016-12-12	Thailand	Homo sapiens	Stool	GI.1	VP1	MN253504
CMH-S003-17	2017-02-22	Thailand	Homo sapiens	Stool	GI.1	VP1	MN253505
CMH-S023-17	2017-04-04	Thailand	Homo sapiens	Stool	GI.1	VP1	MN253506
CMH-S089-17	2017-06-21	Thailand	Homo sapiens	Stool	GI.1	VP1	MN253507
CMH-R031-18	2018-10-21	Thailand	Homo sapiens	Stool	GI.1	VP1	MN253508
CMH-S174-18	2018-11-21	Thailand	Homo sapiens	Stool	GI.1	VP1	MN253509
CMH-ST097-18	2018-04-16	Thailand	Homo sapiens	Stool	GI.1	VP1	MN253510
CMH-ST169-18	2018-06-27	Thailand	Homo sapiens	Stool	GI.1	VP1	MN253511
CMH-S152-15	2015-06-16	Thailand	Homo sapiens	Stool	GI.2	VP1	MN253512
CMH-S252-15	2015-12-20	Thailand	Homo sapiens	Stool	GI.2	VP1	MN253513
CMH-S254-15	2015-12-31	Thailand	Homo sapiens	Stool	GI.2	VP1	MN253514
CMH-S108-16	2016-03-29	Thailand	Homo sapiens	Stool	GI.2	VP1	MN253515
CMH-ST004-16	2016-01-11	Thailand	Homo sapiens	Stool	GI.2	VP1	MN253516
CMH-ST029-16	2016-02-07	Thailand	Homo sapiens	Stool	GI.2	VP1	MN253517
CMH-R076-18	2018-10-21	Thailand	Homo sapiens	Stool	GI.2	VP1	MN253518
CMH-N061-18	2018-02-18	Thailand	Homo sapiens	Stool	GI.5	VP1	MN253519
CMH-S034-13	2013-04-01	Thailand	Homo sapiens	Stool	GII.1	VP1	MN253520
CMH-S120-17	2017-11-21	Thailand	Homo sapiens	Stool	GII.1	VP1	MN253521
CMH-ST028-17	2017-05-09	Thailand	Homo sapiens	Stool	GII.1	VP1	MN253522
CMH-N091-18	2018-06-24	Thailand	Homo sapiens	Stool	GII.1	VP1	MN253523
CMH-N104-18	2018-09-10	Thailand	Homo sapiens	Stool	GII.1	VP1	MN253524
CMH-R140-18	2018-10-21	Thailand	Homo sapiens	Stool	GII.1	VP1	MN253525
CMH-S175-18	2018-11-21	Thailand	Homo sapiens	Stool	GII.1	VP1	MN253526
CMH-ST189-18	2018-07-27	Thailand	Homo sapiens	Stool	GII.1	VP1	MN253527
CMH-N145-12	2012-08-10	Thailand	Homo sapiens	Stool	GII.4	VP1	MN253528
CMH-N021-13	2013-05-02	Thailand	Homo sapiens	Stool	GII.4	VP1	MN253529
CMH-S050-17	2017-06-16	Thailand	Homo sapiens	Stool	GII.4	VP1	MN253530
CMH-S057-17	2017-06-21	Thailand	Homo sapiens	Stool	GII.4	VP1	MN253531
CMH-ST091-16	2016-03-21	Thailand	Homo sapiens	Stool	GII.5	VP1	MN253532
CMH-ST095-16	2016-03-23	Thailand	Homo sapiens	Stool	GII.5	VP1	MN253533
CMH-R089-18	2018-10-21	Thailand	Homo sapiens	Stool	GII.5	VP1	MN253534
CMH-ST202-18	2018-08-15	Thailand	Homo sapiens	Stool	GII.5	VP1	MN253535
CMH-ST207-18	2018-08-17	Thailand	Homo sapiens	Stool	GII.5	VP1	MN253536
CMH-ST247-18	2018-11-10	Thailand	Homo sapiens	Stool	GII.5	VP1	MN253537
CMH-ST266-18	2018-12-15	Thailand	Homo sapiens	Stool	GII.5	VP1	MN253538
CMH-ST270-18	2018-12-29	Thailand	Homo sapiens	Stool	GII.5	VP1	MN253539
CMH-N061-12	2012-02-11	Thailand	Homo sapiens	Stool	GIV.1	VP1	MN253540
CMH-N028-18	2018-02-02	Thailand	Homo sapiens	Stool	GIV.1	VP1	MN253541
